# Supplementary material
Source: PubMed Central journal article supplement (PMC5676225)
Supplement: 911FileS1.pdf [file 911FileS1.pdf]

**Table S1: Strains and Polymorphisms**

| <b>Chromosome</b> | <b>Strains</b> | <b>Variation</b> | <b>Size</b> | <b>Position Start</b> | <b>Position End</b> |
|-------------------|----------------|------------------|-------------|-----------------------|---------------------|
| <b>I</b>          | AB3            | WBVar02075018    | -244        | 1893223               | 1893466             |
|                   | ED3049         | WBVar02076986    | -116        | 1893090               | 1893205             |
| <b>II (a)</b>     | MY2            | WBVar02075171    | -68         | 12828041              | 12828108            |
|                   | JU258          | WBVar02007146    | -129        | 12827972              | 12828100            |
| <b>II (b)</b>     | CB4856         | WBVar00091051    | -174        | 1256637               | 1256810             |
|                   | JU258          | WBVar02040112    | -77         | 1256729               | 1256805             |
| <b>III</b>        | AB3            | WBVar02075237    | -146        | 2889726               | 2889871             |
|                   | ED3049         | WBVar01999312    | -59         | 2889444               | 2889502             |
| <b>IV</b>         | MY2            | WBVar02022215    | -123        | 15349999              | 15350121            |
|                   | JU258          | WBVar02078568    | -56         | 15349619              | 15349674            |
| <b>V</b>          | CB2856         | WBVar02076232    | -162        | 19725512              | 19725618            |
|                   |                | WBVar02074913    | -107        | 19725689              | 19725850            |
|                   | JU258          | WBVar02074913    | -107        | 19725689              | 19725850            |

**Table S1: Strains and polymorphisms used to track inheritance in triploid x diploid crosses.**

**Table S2: All polymorphisms that differ from N2 in 2 different wild strains.**

**List 1**

| Chromosome | Strain 1 | Polymorphism  | Start    | Stop     | Length | Strain 2 | Polymorphism  | Start    | Stop     | Length |
|------------|----------|---------------|----------|----------|--------|----------|---------------|----------|----------|--------|
| I          | AB1      | WBVar02080489 | 2610436  | 2610437  | 70     | ED3049   | WBVar02001683 | 2612381  | 2612423  | -43    |
| I          | AB1      | WBVar02080489 | 2610436  | 2610437  | 70     | ED3049   | WBVar02097244 | 2612753  | 2612754  | 52     |
| II         | AB1      | WBVar01916099 | 3128822  | 3128893  | -72    | ED3049   | WBVar02097638 | 3125644  | 3125645  | 48     |
| III        | AB1      | WBVar02081802 | 12197528 | 12197529 | 44     | ED3049   | WBVar02077064 | 12198607 | 12199017 | -411   |
| III        | AB1      | WBVar01920082 | 12442194 | 12442262 | -69    | ED3049   | WBVar02003410 | 12442158 | 12442226 | -69    |
| IV         | AB1      | WBVar02074756 | 1020751  | 1020919  | -169   | ED3049   | WBVar02077068 | 1020239  | 1020636  | -398   |
| IV         | AB1      | WBVar02082278 | 3126965  | 3126966  | 91     | ED3049   | WBVar02003715 | 3126874  | 3126938  | -65    |
| V          | AB1      | WBVar02074869 | 18576742 | 18576864 | -123   | ED3049   | WBVar02098752 | 18576122 | 18576169 | -48    |
| V          | AB1      | WBVar01925669 | 19294513 | 19294562 | -50    | ED3049   | WBVar02098761 | 19290194 | 19290195 | 49     |
| X          | AB1      | WBVar02074973 | 17256947 | 17257065 | -119   | ED3049   | WBVar02098879 | 17256905 | 17256988 | -84    |
| I          | ED3049   | WBVar02001853 | 11190674 | 11190778 | -105   | AB3      | WBVar01932525 | 11194116 | 11194184 | -69    |
| I          | ED3049   | WBVar02001318 | 1688367  | 1688459  | -93    | AB3      | WBVar01931017 | 1687191  | 1687280  | -90    |
| I          | ED3049   | WBVar02001345 | 1783402  | 1783479  | -78    | AB3      | WBVar02075012 | 1783461  | 1783572  | -112   |
| I          | ED3049   | WBVar02001346 | 1783516  | 1783592  | -77    | AB3      | WBVar02075012 | 1783461  | 1783572  | -112   |
| I          | ED3049   | WBVar02001370 | 1891326  | 1891430  | -105   | AB3      | WBVar01931168 | 1891326  | 1891395  | -70    |
| I          | ED3049   | WBVar02076986 | 1893090  | 1893205  | -116   | AB3      | WBVar02075018 | 1893223  | 1893466  | -244   |
| I          | ED3049   | WBVar02001381 | 1926511  | 1926553  | -43    | AB3      | WBVar01931203 | 1927061  | 1927103  | -43    |
| I          | ED3049   | WBVar02001381 | 1926511  | 1926553  | -43    | AB3      | WBVar01931205 | 1927968  | 1928026  | -59    |
| I          | ED3049   | WBVar02076988 | 1939845  | 1939957  | -113   | AB3      | WBVar01931219 | 1937815  | 1937883  | -69    |
| I          | ED3049   | WBVar02001411 | 1970537  | 1970612  | -76    | AB3      | WBVar01988366 | 1973030  | 1973131  | -102   |
| I          | ED3049   | WBVar02076989 | 1974507  | 1974626  | -120   | AB3      | WBVar01988366 | 1973030  | 1973131  | -102   |
| I          | ED3049   | WBVar02076994 | 2501728  | 2501899  | -172   | AB3      | WBVar01931677 | 2501882  | 2501935  | -54    |
| I          | ED3049   | WBVar02076994 | 2501728  | 2501899  | -172   | AB3      | WBVar02075030 | 2500547  | 2500653  | -107   |
| I          | ED3049   | WBVar02076995 | 2504708  | 2504825  | -118   | AB3      | WBVar01931677 | 2501882  | 2501935  | -54    |
| I          | ED3049   | WBVar02076995 | 2504708  | 2504825  | -118   | AB3      | WBVar02075030 | 2500547  | 2500653  | -107   |
| II         | ED3049   | WBVar02077047 | 12230680 | 12230983 | -304   | AB3      | WBVar01936089 | 12234746 | 12234822 | -77    |
| II         | ED3049   | WBVar02077052 | 13336794 | 13336914 | -121   | AB3      | WBVar02075178 | 13339250 | 13339545 | -296   |
| II         | ED3049   | WBVar02097740 | 13409894 | 13409895 | 56     | AB3      | WBVar01936682 | 13409816 | 13409870 | -55    |
| II         | ED3049   | WBVar02097740 | 13409894 | 13409895 | 56     | AB3      | WBVar02085026 | 13409918 | 13409919 | 56     |
| III        | ED3049   | WBVar02077057 | 2112572  | 2112942  | -371   | AB3      | WBVar01937911 | 2113385  | 2113463  | -79    |
| III        | ED3049   | WBVar02097798 | 2718921  | 2718922  | 73     | AB3      | WBVar01938195 | 2718882  | 2718923  | -42    |

|     |        |               |          |          |      |        |               |          |          |      |
|-----|--------|---------------|----------|----------|------|--------|---------------|----------|----------|------|
| III | ED3049 | WBVar02003304 | 3272812  | 3272853  | -42  | AB3    | WBVar01938659 | 3271177  | 3271236  | -60  |
| IV  | ED3049 | WBVar02077084 | 16837737 | 16837853 | -117 | AB3    | WBVar01940685 | 16839740 | 16839812 | -73  |
| V   | ED3049 | WBVar02098752 | 18576122 | 18576169 | -48  | AB3    | WBVar01940803 | 18576123 | 18576169 | -47  |
| V   | ED3049 | WBVar02098555 | 4052585  | 4052664  | -80  | AB3    | WBVar01940736 | 4051689  | 4051776  | -88  |
| X   | ED3049 | WBVar02098853 | 14236630 | 14236708 | -79  | AB3    | WBVar01941989 | 14236637 | 14236698 | -62  |
| I   | ED3052 | WBVar02077169 | 1169882  | 1170127  | -246 | CB4856 | WBVar02075701 | 1168048  | 1168234  | -187 |
| II  | ED3052 | WBVar02099354 | 11307013 | 11307014 | 72   | CB4856 | WBVar02089242 | 11307013 | 11307014 | 48   |
| II  | ED3052 | WBVar02007146 | 12828041 | 12828108 | -68  | CB4856 | WBVar01960670 | 12828849 | 12828927 | -79  |
| II  | ED3052 | WBVar02077223 | 13343756 | 13344107 | -352 | CB4856 | WBVar01960749 | 13344730 | 13344786 | -57  |
| II  | ED3052 | WBVar02077225 | 13398204 | 13398476 | -273 | CB4856 | WBVar01960777 | 13395178 | 13395247 | -70  |
| II  | ED3052 | WBVar02007280 | 13627816 | 13627856 | -41  | CB4856 | WBVar01960907 | 13629975 | 13630031 | -57  |
| II  | ED3052 | WBVar02007305 | 13747213 | 13747290 | -78  | CB4856 | WBVar02089343 | 13747383 | 13747384 | 78   |
| II  | ED3052 | WBVar02007305 | 13747213 | 13747290 | -78  | CB4856 | WBVar01960967 | 13748532 | 13748590 | -59  |
| II  | ED3052 | WBVar02006763 | 1457601  | 1457669  | -69  | CB4856 | WBVar01959194 | 1455966  | 1456050  | -85  |
| III | ED3052 | WBVar02077240 | 1917890  | 1918069  | -180 | CB4856 | WBVar01961992 | 1916321  | 1916395  | -75  |
| III | ED3052 | WBVar02099504 | 2011892  | 2011893  | 93   | CB4856 | WBVar02075909 | 2014045  | 2014350  | -306 |
| IV  | ED3052 | WBVar02007871 | 1348018  | 1348083  | -66  | CB4856 | WBVar01964558 | 1348973  | 1349040  | -68  |
| IV  | ED3052 | WBVar02007872 | 1349150  | 1349191  | -42  | CB4856 | WBVar01964558 | 1348973  | 1349040  | -68  |
| IV  | ED3052 | WBVar02077257 | 1611530  | 1611833  | -304 | CB4856 | WBVar01964719 | 1612027  | 1612118  | -92  |
| IV  | ED3052 | WBVar02007969 | 1612064  | 1612115  | -52  | CB4856 | WBVar01964719 | 1612027  | 1612118  | -92  |
| IV  | ED3052 | WBVar02077258 | 1614606  | 1614723  | -118 | CB4856 | WBVar01964719 | 1612027  | 1612118  | -92  |
| V   | ED3052 | WBVar02008790 | 1069439  | 1069545  | -107 | CB4856 | WBVar01970792 | 1069973  | 1070046  | -74  |
| V   | ED3052 | WBVar02008920 | 18190475 | 18190529 | -55  | CB4856 | WBVar02076204 | 18194921 | 18195388 | -468 |
| V   | ED3052 | WBVar02008920 | 18190475 | 18190529 | -55  | CB4856 | WBVar02076204 | 18194921 | 18195388 | -468 |
| X   | ED3052 | WBVar02009008 | 1544686  | 1544748  | -63  | CB4856 | WBVar01979392 | 1540860  | 1540901  | -42  |
| X   | ED3052 | WBVar02009008 | 1544686  | 1544748  | -63  | CB4856 | WBVar02076270 | 1542487  | 1542678  | -192 |
| I   | JU1171 | WBVar02016446 | 11563213 | 11563302 | -90  | ED3049 | WBVar02097284 | 11563412 | 11563481 | -70  |
| I   | JU1171 | WBVar02016446 | 11563213 | 11563302 | -90  | ED3049 | WBVar02097285 | 11563526 | 11563598 | -73  |
| I   | JU1171 | WBVar02016446 | 11563213 | 11563302 | -90  | ED3049 | WBVar02001975 | 11563869 | 11563938 | -70  |
| I   | JU1171 | WBVar02015983 | 1782797  | 1782873  | -77  | ED3049 | WBVar02001345 | 1783402  | 1783479  | -78  |
| I   | JU1171 | WBVar02015983 | 1782797  | 1782873  | -77  | ED3049 | WBVar02001346 | 1783516  | 1783592  | -77  |
| I   | JU1171 | WBVar02015984 | 1782949  | 1782990  | -42  | ED3049 | WBVar02001345 | 1783402  | 1783479  | -78  |
| I   | JU1171 | WBVar02015984 | 1782949  | 1782990  | -42  | ED3049 | WBVar02001346 | 1783516  | 1783592  | -77  |
| I   | JU1171 | WBVar02015985 | 1783041  | 1783084  | -44  | ED3049 | WBVar02001345 | 1783402  | 1783479  | -78  |

|     |        |              |          |          |      |        |              |          |          |      |
|-----|--------|--------------|----------|----------|------|--------|--------------|----------|----------|------|
| I   | JU1171 | WVar02015985 | 1783041  | 1783084  | -44  | ED3049 | WVar02001346 | 1783516  | 1783592  | -77  |
| I   | JU1171 | WVar02016008 | 1890488  | 1890536  | -49  | ED3049 | WVar02001370 | 1891326  | 1891430  | -105 |
| I   | JU1171 | WVar02016008 | 1890488  | 1890536  | -49  | ED3049 | WVar02076986 | 1893090  | 1893205  | -116 |
| I   | JU1171 | WVar02077622 | 1891786  | 1892084  | -299 | ED3049 | WVar02001370 | 1891326  | 1891430  | -105 |
| I   | JU1171 | WVar02077622 | 1891786  | 1892084  | -299 | ED3049 | WVar02076986 | 1893090  | 1893205  | -116 |
| II  | JU1171 | WVar02077697 | 8877949  | 8878066  | -118 | ED3049 | WVar02002883 | 8877662  | 8877744  | -83  |
| II  | JU1171 | WVar02018171 | 12200948 | 12200993 | -46  | ED3049 | WVar02077046 | 12202885 | 12203023 | -139 |
| III | JU1171 | WVar02019543 | 12277823 | 12277872 | -50  | ED3049 | WVar02097831 | 12279717 | 12279777 | -61  |
| IV  | JU1171 | WVar02103531 | 3126874  | 3126973  | -100 | ED3049 | WVar02003715 | 3126874  | 3126938  | -65  |
| IV  | JU1171 | WVar02020395 | 3526945  | 3527001  | -57  | ED3049 | WVar02003738 | 3529461  | 3529514  | -54  |
| V   | JU1171 | WVar02077923 | 18575482 | 18575614 | -133 | ED3049 | WVar02098752 | 18576122 | 18576169 | -48  |
| V   | JU1171 | WVar02025451 | 18575572 | 18575628 | -57  | ED3049 | WVar02098752 | 18576122 | 18576169 | -48  |
| V   | JU1171 | WVar02025452 | 18576127 | 18576175 | -49  | ED3049 | WVar02098752 | 18576122 | 18576169 | -48  |
| X   | JU1171 | WVar02078000 | 14252768 | 14253118 | -351 | ED3049 | WVar02005470 | 14250312 | 14250362 | -51  |
| X   | JU1171 | WVar02078005 | 15713583 | 15713878 | -296 | ED3049 | WVar02005590 | 15710635 | 15710728 | -94  |

**List 2**

| Chromosome | Strain 1 | Polymorphism | Start    | Stop     | Length | Strain 2 | Polymorphism | Start    | Stop     | Length |
|------------|----------|--------------|----------|----------|--------|----------|--------------|----------|----------|--------|
| I          | JU258    | WVar02078445 | 1042094  | 1042245  | -152   | JU1171   | WVar01930363 | 1043197  | 1043256  | -60    |
| I          | JU1171   | WVar02078453 | 1324181  | 1324345  | -165   | JU258    | WVar01930620 | 1324164  | 1324257  | -94    |
| I          | JU1171   | WVar01933241 | 1086022  | 1086089  | -68    | JU258    | WVar02077661 | 1085740  | 1085971  | -232   |
| II         | JU258    | WVar01239918 | 1411611  | 1411869  | -259   | JU1171   | WVar02017413 | 1412142  | 1412205  | -64    |
| II         | JU1171   | WVar02077028 | 1946965  | 1947173  | -209   | JU258    | WVar02102873 | 1946349  | 1946417  | -69    |
| II         | JU1171   | WVar02007146 | 12828041 | 12828108 | -68    | JU258    | WVar02075171 | 12827972 | 12828100 | -129   |
| II         | JU258    | WVar02075185 | 13481436 | 13481654 | -219   | JU1171   | WVar02014467 | 13482265 | 13482346 | -82    |
| II         | JU1171   | WVar01999077 | 13861868 | 13861922 | -55    | JU258    | WVar02077711 | 13861149 | 13861314 | -166   |
| II         | JU258    | WVar00091209 | 1884492  | 1885092  | -601   | JU1171   | WVar02074707 | 1884515  | 1885056  | -542   |
| III        | JU1171   | WVar02078524 | 11832794 | 11833038 | -245   | JU258    | WVar02077748 | 11831884 | 11832040 | -157   |
| III        | JU258    | WVar02078532 | 1416442  | 1417206  | -765   | JU1171   | WVar02077494 | 1416600  | 1416755  | -156   |
| IV         | JU1171   | WVar02078535 | 2156995  | 2157120  | -126   | JU258    | WVar01921605 | 2156600  | 2156662  | -63    |
| IV         | JU1171   | WVar02075980 | 3310090  | 3310229  | -140   | JU258    | WVar02077778 | 3310080  | 3310289  | -210   |
| IV         | JU1171   | WVar02077266 | 6607645  | 6607803  | -159   | JU258    | WVar02103696 | 6606696  | 6606767  | -72    |
| IV         | JU1171   | WVar02078568 | 15349999 | 15350121 | -123   | JU258    | WVar02022215 | 15349619 | 15349674 | -56    |

|     |        |               |          |          |      |        |               |          |          |      |
|-----|--------|---------------|----------|----------|------|--------|---------------|----------|----------|------|
| IV  | JU258  | WBVar02043250 | 2170316  | 2170406  | -91  | JU1171 | WBVar02077855 | 2171230  | 2171396  | -167 |
| V   | JU1171 | WBVar00091244 | 15319857 | 15320228 | -372 | JU258  | WBVar02077896 | 15319849 | 15319991 | -143 |
| V   | JU258  | WBVar02044243 | 18347098 | 18347199 | -102 | JU1171 | WBVar02077920 | 18347743 | 18347929 | -187 |
| V   | JU258  | WBVar01941014 | 19820220 | 19820306 | -87  | JU1171 | WBVar02077950 | 19820824 | 19821016 | -193 |
| V   | JU1171 | WBVar02075304 | 20016582 | 20016700 | -119 | JU258  | WBVar02077955 | 20016509 | 20016694 | -186 |
| V   | JU1171 | WBVar02075305 | 20069425 | 20069554 | -130 | JU258  | WBVar02077960 | 20069103 | 20069326 | -224 |
| V   | JU1171 | WBVar01941130 | 20069954 | 20070004 | -51  | JU258  | WBVar02077960 | 20069103 | 20069326 | -224 |
| V   | JU1171 | WBVar01941302 | 20400807 | 20400900 | -94  | JU258  | WBVar02077968 | 20400071 | 20400345 | -275 |
| V   | JU258  | WBVar00091266 | 1362887  | 1363777  | -891 | JU1171 | WBVar02076266 | 1362958  | 1363099  | -142 |
| X   | JU258  | WBVar02075324 | 14442575 | 14442688 | -114 | JU1171 | WBVar02013883 | 14442604 | 14442657 | -54  |
| I   | JU258  | WBVar02078445 | 1042094  | 1042245  | -152 | MY2    | WBVar01930363 | 1043197  | 1043256  | -60  |
| I   | JU258  | WBVar02039179 | 1209734  | 1209803  | -70  | MY2    | WBVar02076691 | 1209826  | 1210196  | -371 |
| I   | MY2    | WBVar02078450 | 1210490  | 1210671  | -182 | JU258  | WBVar02076691 | 1209826  | 1210196  | -371 |
| I   | MY2    | WBVar02078453 | 1324181  | 1324345  | -165 | JU258  | WBVar01930620 | 1324164  | 1324257  | -94  |
| I   | MY2    | WBVar01947665 | 1904201  | 1904272  | -72  | JU258  | WBVar02079634 | 1903348  | 1903816  | -469 |
| I   | JU258  | WBVar01239918 | 1411611  | 1411869  | -259 | MY2    | WBVar02017413 | 1412142  | 1412205  | -64  |
| II  | MY2    | WBVar02077028 | 1946965  | 1947173  | -209 | JU258  | WBVar02102873 | 1946349  | 1946417  | -69  |
| II  | MY2    | WBVar02007146 | 12828041 | 12828108 | -68  | JU258  | WBVar02075171 | 12827972 | 12828100 | -129 |
| II  | JU258  | WBVar02075185 | 13481436 | 13481654 | -219 | MY2    | WBVar02014467 | 13482265 | 13482346 | -82  |
| II  | JU258  | WBVar00091209 | 1884492  | 1885092  | -601 | MY2    | WBVar02074707 | 1884515  | 1885056  | -542 |
| III | MY2    | WBVar02078524 | 11832794 | 11833038 | -245 | JU258  | WBVar02077748 | 11831884 | 11832040 | -157 |
| III | JU258  | WBVar02078532 | 1416442  | 1417206  | -765 | MY2    | WBVar02077494 | 1416600  | 1416755  | -156 |
| IV  | MY2    | WBVar02078535 | 2156995  | 2157120  | -126 | JU258  | WBVar01921605 | 2156600  | 2156662  | -63  |
| IV  | MY2    | WBVar02075980 | 3310090  | 3310229  | -140 | JU258  | WBVar02077778 | 3310080  | 3310289  | -210 |
| IV  | MY2    | WBVar02077266 | 6607645  | 6607803  | -159 | JU258  | WBVar02103696 | 6606696  | 6606767  | -72  |
| IV  | MY2    | WBVar02078568 | 15349999 | 15350121 | -123 | JU258  | WBVar02022215 | 15349619 | 15349674 | -56  |
| IV  | JU258  | WBVar02043250 | 2170316  | 2170406  | -91  | MY2    | WBVar02077855 | 2171230  | 2171396  | -167 |
| V   | MY2    | WBVar00091244 | 15319857 | 15320228 | -372 | JU258  | WBVar02077896 | 15319849 | 15319991 | -143 |
| V   | JU258  | WBVar02044243 | 18347098 | 18347199 | -102 | MY2    | WBVar02077920 | 18347743 | 18347929 | -187 |
| V   | JU258  | WBVar01941014 | 19820220 | 19820306 | -87  | MY2    | WBVar02077950 | 19820824 | 19821016 | -193 |
| V   | MY2    | WBVar02075305 | 20069425 | 20069554 | -130 | JU258  | WBVar02077960 | 20069103 | 20069326 | -224 |
| V   | MY2    | WBVar01941130 | 20069954 | 20070004 | -51  | JU258  | WBVar02077960 | 20069103 | 20069326 | -224 |
| V   | MY2    | WBVar01941302 | 20400807 | 20400900 | -94  | JU258  | WBVar02077968 | 20400071 | 20400345 | -275 |
| V   | JU258  | WBVar02075312 | 20490869 | 20491226 | -358 | MY2    | WBVar02079791 | 20491298 | 20491528 | -231 |

|     |        |               |          |          |      |        |               |          |          |      |
|-----|--------|---------------|----------|----------|------|--------|---------------|----------|----------|------|
| V   | JU258  | WBVar00091266 | 1362887  | 1363777  | -891 | MY2    | WBVar02076266 | 1362958  | 1363099  | -142 |
| X   | JU258  | WBVar02075324 | 14442575 | 14442688 | -114 | MY2    | WBVar02013883 | 14442604 | 14442657 | -54  |
| I   | JU258  | WBVar02078445 | 1042094  | 1042245  | -152 | MY14   | WBVar01930363 | 1043197  | 1043256  | -60  |
| I   | MY14   | WBVar02078453 | 1324181  | 1324345  | -165 | JU258  | WBVar01930620 | 1324164  | 1324257  | -94  |
| I   | MY14   | WBVar01947665 | 1904201  | 1904272  | -72  | JU258  | WBVar02079634 | 1903348  | 1903816  | -469 |
| I   | JU258  | WBVar01239918 | 1411611  | 1411869  | -259 | MY14   | WBVar02017413 | 1412142  | 1412205  | -64  |
| II  | MY14   | WBVar02077028 | 1946965  | 1947173  | -209 | JU258  | WBVar02102873 | 1946349  | 1946417  | -69  |
| II  | MY14   | WBVar02007146 | 12828041 | 12828108 | -68  | JU258  | WBVar02075171 | 12827972 | 12828100 | -129 |
| II  | JU258  | WBVar02075185 | 13481436 | 13481654 | -219 | MY14   | WBVar02014467 | 13482265 | 13482346 | -82  |
| II  | JU258  | WBVar00091209 | 1884492  | 1885092  | -601 | MY14   | WBVar02074707 | 1884515  | 1885056  | -542 |
| III | MY14   | WBVar02078524 | 11832794 | 11833038 | -245 | JU258  | WBVar02077748 | 11831884 | 11832040 | -157 |
| III | JU258  | WBVar02078532 | 1416442  | 1417206  | -765 | MY14   | WBVar02077494 | 1416600  | 1416755  | -156 |
| IV  | MY14   | WBVar02078535 | 2156995  | 2157120  | -126 | JU258  | WBVar01921605 | 2156600  | 2156662  | -63  |
| IV  | MY14   | WBVar02075980 | 3310090  | 3310229  | -140 | JU258  | WBVar02077778 | 3310080  | 3310289  | -210 |
| IV  | MY14   | WBVar02077266 | 6607645  | 6607803  | -159 | JU258  | WBVar02103696 | 6606696  | 6606767  | -72  |
| IV  | MY14   | WBVar02078568 | 15349999 | 15350121 | -123 | JU258  | WBVar02022215 | 15349619 | 15349674 | -56  |
| IV  | JU258  | WBVar02043250 | 2170316  | 2170406  | -91  | MY14   | WBVar02077855 | 2171230  | 2171396  | -167 |
| V   | MY14   | WBVar00091244 | 15319857 | 15320228 | -372 | JU258  | WBVar02077896 | 15319849 | 15319991 | -143 |
| V   | JU258  | WBVar02044243 | 18347098 | 18347199 | -102 | MY14   | WBVar02077920 | 18347743 | 18347929 | -187 |
| V   | JU258  | WBVar01941014 | 19820220 | 19820306 | -87  | MY14   | WBVar02077950 | 19820824 | 19821016 | -193 |
| V   | MY14   | WBVar02075304 | 20016582 | 20016700 | -119 | JU258  | WBVar02077955 | 20016509 | 20016694 | -186 |
| V   | MY14   | WBVar02075305 | 20069425 | 20069554 | -130 | JU258  | WBVar02077960 | 20069103 | 20069326 | -224 |
| V   | MY14   | WBVar01941130 | 20069954 | 20070004 | -51  | JU258  | WBVar02077960 | 20069103 | 20069326 | -224 |
| V   | MY14   | WBVar01941302 | 20400807 | 20400900 | -94  | JU258  | WBVar02077968 | 20400071 | 20400345 | -275 |
| V   | JU258  | WBVar00091266 | 1362887  | 1363777  | -891 | MY14   | WBVar02076266 | 1362958  | 1363099  | -142 |
| X   | JU258  | WBVar02075324 | 14442575 | 14442688 | -114 | MY14   | WBVar02013883 | 14442604 | 14442657 | -54  |
| I   | MY16   | WBVar01992884 | 1061360  | 1061413  | -54  | ED3049 | WBVar02076689 | 1061360  | 1061476  | -117 |
| I   | MY16   | WBVar02078014 | 1912482  | 1912810  | -329 | ED3049 | WBVar02001378 | 1913065  | 1913132  | -68  |
| I   | MY16   | WBVar02102873 | 1946349  | 1946417  | -69  | ED3049 | WBVar02077028 | 1946965  | 1947173  | -209 |
| II  | ED3049 | WBVar02076586 | 13423586 | 13423865 | -280 | MY16   | WBVar02076752 | 13422858 | 13422997 | -140 |
| II  | ED3049 | WBVar02075226 | 2257896  | 2258154  | -259 | MY16   | WBVar01918534 | 2257263  | 2257318  | -56  |
| III | ED3049 | WBVar02019429 | 11926136 | 11926207 | -72  | MY16   | WBVar02075261 | 11925619 | 11926290 | -672 |
| III | MY16   | WBVar02077759 | 1348972  | 1349175  | -204 | ED3049 | WBVar01964558 | 1348973  | 1349040  | -68  |
| IV  | MY16   | WBVar02118974 | 2283020  | 2283105  | -86  | ED3049 | WBVar02076821 | 2283173  | 2283338  | -166 |

|     |        |               |          |          |      |        |               |          |          |      |
|-----|--------|---------------|----------|----------|------|--------|---------------|----------|----------|------|
| IV  | ED3049 | WBVar02077777 | 3063758  | 3064006  | -249 | MY16   | WBVar01922449 | 3063393  | 3063444  | -52  |
| IV  | ED3049 | WBVar02008820 | 5284653  | 5284704  | -52  | MY16   | WBVar01940743 | 5284617  | 5284720  | -104 |
| V   | ED3049 | WBVar02077950 | 19820824 | 19821016 | -193 | MY16   | WBVar01941014 | 19820220 | 19820306 | -87  |
| V   | MY16   | WBVar02077950 | 19820824 | 19821016 | -193 | ED3049 | WBVar01941017 | 19821358 | 19821414 | -57  |
| V   | MY16   | WBVar02077960 | 20069103 | 20069326 | -224 | ED3049 | WBVar02075305 | 20069425 | 20069554 | -130 |
| V   | MY16   | WBVar02077960 | 20069103 | 20069326 | -224 | ED3049 | WBVar01941130 | 20069954 | 20070004 | -51  |
| V   | ED3049 | WBVar02079743 | 8924943  | 8925150  | -208 | MY16   | WBVar01927801 | 8924566  | 8924621  | -56  |
| X   | ED3049 | WBVar02047840 | 15733344 | 15733400 | -57  | MY16   | WBVar02074961 | 15732427 | 15732601 | -175 |
| I   | CB4856 | WBVar01408978 | 1746799  | 1747040  | -242 | MY1    | WBVar01931067 | 1746808  | 1746912  | -105 |
| I   | MY1    | WBVar02075713 | 1938077  | 1938216  | -140 | CB4856 | WBVar01931219 | 1937815  | 1937883  | -69  |
| I   | MY1    | WBVar01957930 | 11813571 | 11813643 | -73  | CB4856 | WBVar02076716 | 11813131 | 11813671 | -541 |
| I   | CB4856 | WBVar02075774 | 12851998 | 12852111 | -114 | MY1    | WBVar02076730 | 12852174 | 12852479 | -306 |
| I   | MY1    | WBVar01949923 | 13412239 | 13412295 | -57  | CB4856 | WBVar02075377 | 13412145 | 13412301 | -157 |
| II  | MY1    | WBVar02075204 | 14189012 | 14189177 | -166 | CB4856 | WBVar01994462 | 14188437 | 14188536 | -100 |
| II  | MY1    | WBVar02075886 | 35019    | 35252    | -234 | CB4856 | WBVar02079558 | 34997    | 35293    | -297 |
| III | MY1    | WBVar02074679 | 912940   | 913132   | -193 | CB4856 | WBVar01983513 | 912723   | 912784   | -62  |
| III | MY1    | WBVar02075898 | 923023   | 923134   | -112 | CB4856 | WBVar01983515 | 922832   | 922890   | -59  |
| III | CB4856 | WBVar01963266 | 11311160 | 11311213 | -54  | MY1    | WBVar01995831 | 11311884 | 11311987 | -104 |
| III | CB4856 | WBVar01953182 | 12400858 | 12400921 | -64  | MY1    | WBVar02075269 | 12400937 | 12401071 | -135 |
| III | MY1    | WBVar02075648 | 12414603 | 12414778 | -176 | CB4856 | WBVar02081899 | 12414374 | 12414443 | -70  |
| III | MY1    | WBVar02075943 | 12631521 | 12631658 | -138 | CB4856 | WBVar02075275 | 12630976 | 12631368 | -393 |
| III | MY1    | WBVar02076046 | 15854160 | 15854291 | -132 | CB4856 | WBVar02069958 | 15853732 | 15853785 | -54  |
| IV  | CB4856 | WBVar02076056 | 16427960 | 16428159 | -200 | MY1    | WBVar01969798 | 16428994 | 16429064 | -71  |
| IV  | MY1    | WBVar02076232 | 19725689 | 19725850 | -162 | CB4856 | WBVar02074913 | 19725512 | 19725618 | -107 |
| V   | MY1    | WBVar01978616 | 20491400 | 20491484 | -85  | CB4856 | WBVar02075312 | 20490869 | 20491226 | -358 |
| V   | MY1    | WBVar02076309 | 10973749 | 10974537 | -789 | CB4856 | WBVar02076308 | 10973616 | 10974483 | -868 |
| X   | MY1    | WBVar02076309 | 10973749 | 10974537 | -789 | CB4856 | WBVar02079628 | 10973697 | 10974537 | -841 |
| I   | CB4856 | WBVar01932256 | 4056394  | 4056447  | -54  | JU258  | WBVar02078460 | 4056495  | 4056674  | -180 |
| I   | JU258  | WBVar01957930 | 11813571 | 11813643 | -73  | CB4856 | WBVar02076716 | 11813131 | 11813671 | -541 |
| I   | CB4856 | WBVar02075774 | 12851998 | 12852111 | -114 | JU258  | WBVar02076730 | 12852174 | 12852479 | -306 |
| I   | JU258  | WBVar02075795 | 681454   | 682030   | -577 | CB4856 | WBVar02006567 | 681267   | 681340   | -74  |
| II  | CB4856 | WBVar00091051 | 1256637  | 1256810  | -174 | JU258  | WBVar02040112 | 1256729  | 1256805  | -77  |
| II  | JU258  | WBVar02075828 | 2793398  | 2793678  | -281 | CB4856 | WBVar01982326 | 2792644  | 2792695  | -52  |
| II  | JU258  | WBVar01959583 | 2883346  | 2883407  | -62  | CB4856 | WBVar02078482 | 2882236  | 2882405  | -170 |

|     |        |               |          |          |      |        |               |          |          |      |
|-----|--------|---------------|----------|----------|------|--------|---------------|----------|----------|------|
| II  | JU258  | WBVar00091075 | 3895855  | 3896058  | -204 | CB4856 | WBVar00091196 | 3894864  | 3895646  | -783 |
| II  | JU258  | WBVar01265585 | 14158590 | 14158845 | -256 | CB4856 | WBVar02040912 | 14158325 | 14158408 | -84  |
| II  | JU258  | WBVar02075908 | 2004875  | 2005185  | -311 | CB4856 | WBVar01918416 | 2004357  | 2004446  | -90  |
| III | JU258  | WBVar01951713 | 2364306  | 2364372  | -67  | CB4856 | WBVar02077242 | 2363451  | 2363645  | -195 |
| III | CB4856 | WBVar01962383 | 2881371  | 2881439  | -69  | JU258  | WBVar02078118 | 2881935  | 2882147  | -213 |
| III | CB4856 | WBVar01963776 | 12278589 | 12278647 | -59  | JU258  | WBVar01402105 | 12279330 | 12279633 | -304 |
| III | CB4856 | WBVar02075956 | 1859937  | 1860202  | -266 | JU258  | WBVar02077765 | 1860353  | 1860722  | -370 |
| IV  | CB4856 | WBVar00091094 | 2058231  | 2058604  | -374 | JU258  | WBVar01965042 | 2058358  | 2058450  | -93  |
| IV  | CB4856 | WBVar01921605 | 2156600  | 2156662  | -63  | JU258  | WBVar02078535 | 2156995  | 2157120  | -126 |
| IV  | CB4856 | WBVar02075983 | 3455215  | 3455348  | -134 | JU258  | WBVar02076830 | 3455443  | 3456024  | -582 |
| IV  | JU258  | WBVar02074816 | 4335709  | 4335950  | -242 | CB4856 | WBVar01923176 | 4335058  | 4335111  | -54  |
| IV  | JU258  | WBVar01968477 | 14758248 | 14758310 | -63  | CB4856 | WBVar02078396 | 14757296 | 14757411 | -116 |
| IV  | JU258  | WBVar02076232 | 19725689 | 19725850 | -162 | CB4856 | WBVar02074913 | 19725512 | 19725618 | -107 |
| V   | JU258  | WBVar01978616 | 20491400 | 20491484 | -85  | CB4856 | WBVar02075312 | 20490869 | 20491226 | -358 |
| V   | JU258  | WBVar02076266 | 1362958  | 1363099  | -142 | CB4856 | WBVar00091266 | 1362887  | 1363777  | -891 |
| X   | JU258  | WBVar02076309 | 10973749 | 10974537 | -789 | CB4856 | WBVar02076308 | 10973616 | 10974483 | -868 |



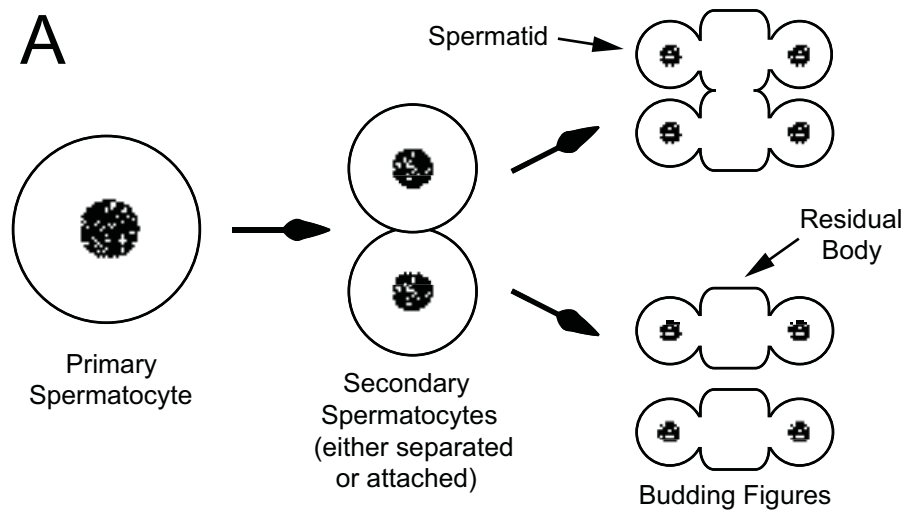

**B** Attached budding figure

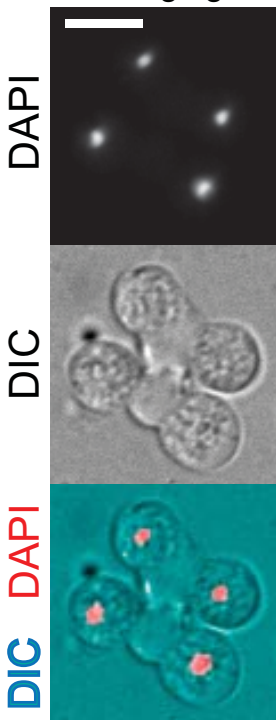

35/36 MII anaphase  
leave no DNA in the  
residual body

**B** Separated budding figure

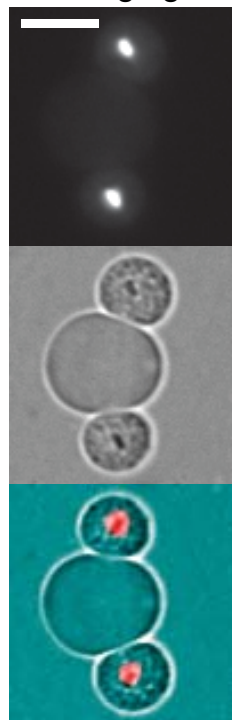

17/17 MII anaphase  
leave no DNA in  
the residual body

**C**

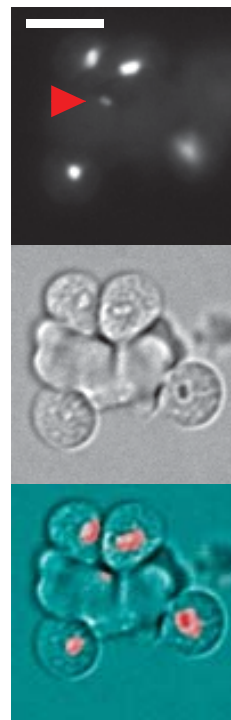

1/53 MII anaphase  
leave DNA in the  
residual body

**Figure S1. Correction of triploidy is rarely observed during spermatocyte meiosis.** Shown in (A) is a depiction of spermatogenesis. The first meiotic division yields two secondary spermatocytes which can either be separated or remain attached. Secondary spermatocytes undergo a budding division during which haploid spermatids separate from a residual body. (B) DAPI and DIC images of budding figures from male triploid *C. elegans* with no DNA in the residual body. (C) Budding figure from male triploid *C. elegans* which appears to have DNA in the residual body. Bars equal 5 $\mu$ m. Red arrow indicates DNA in the residual body.

**A****Primers**

| Chromosome | Forward (5'->3')        | Reverse (5'->3')          | Strains                  | Products                |
|------------|-------------------------|---------------------------|--------------------------|-------------------------|
| I          | CCACCATGTTCTTTGGAGTGC   | ATTGCGGCTAAAGGTTTGTGG     | N2/4N<br>AB3<br>ED3049   | 748bp<br>504bp<br>632bp |
| II (a)     | AGAAGCGGGTTTAACCTACCA   | ACTTTCTAAAGTGAAATAGCGGGTA | N2/4N<br>MY2<br>JU258    | 819bp<br>690bp<br>751bp |
| II (b) #1  | GACGGGGGTTGGAGATGATG    | TTCTTCTCGAGGCCACTTGC      | N2/4N<br>CB4856<br>JU258 | 507bp<br>333bp<br>430bp |
| II (b) #2  | GCTACCGACTTCACAACGGA    | CGTGACCGGACACTGGATAG      | N2/4N<br>CB4856<br>JU258 | 618bp<br>444bp<br>541bp |
| III        | CCCGCTTACGAGTCCAAGG     | ATGGGGCAGCGAGTCAAAA       | N2/4N<br>AB3<br>ED3049   | 722bp<br>576bp<br>663bp |
| IV         | CGGAAATTGTAGGCCGCAGTA   | TTTCAGTCCTTCAGATCACTCGT   | N2/4N<br>MY2<br>JU258    | 878bp<br>822bp<br>755bp |
| V #1       | AGGAGAAAATTCTGCGTCAATGG | GAGGTTTTGGAGCAGCTAGGA     | N2/4N<br>CB4856<br>JU258 | 756bp<br>487bp<br>649bp |
| V #2       | GGAGAAAATTCTGCGTCAATGGA | GTTTGGAGGTTTTGGAGCAGC     | N2/4N<br>CB4856<br>JU258 | 760bp<br>491bp<br>653bp |

**B**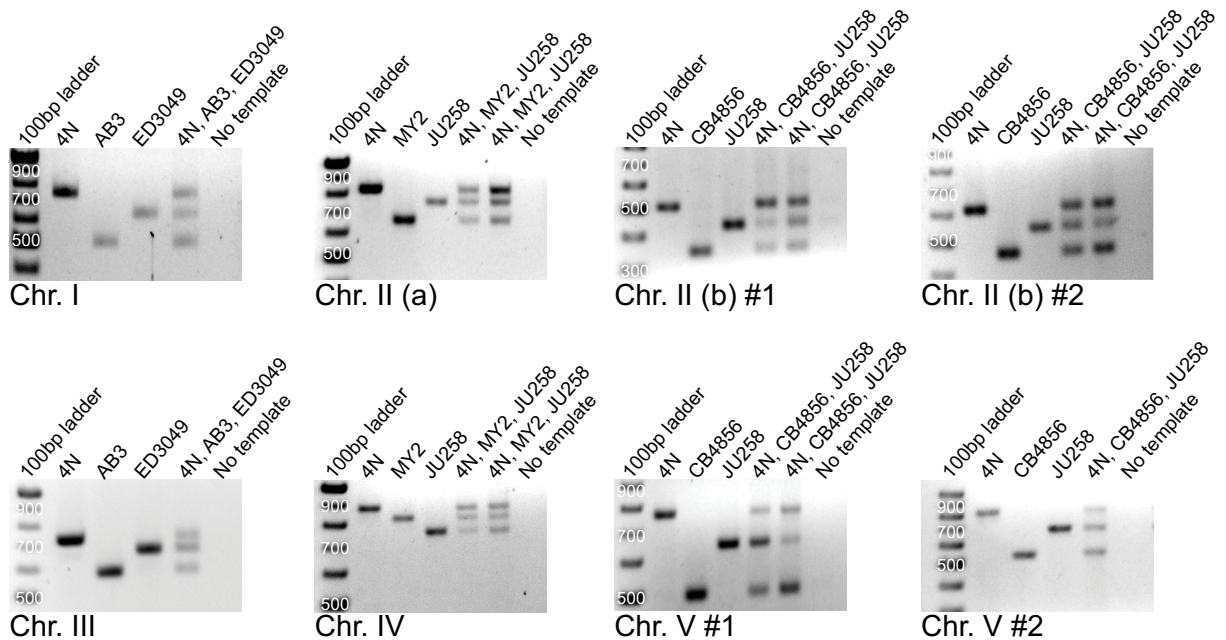

**Figure S2.** (A) Primers used for tracking polymorphisms in 3N x 2N crosses. (B) PCR results are shown for all primer pairs utilized.

## Diploid Cross

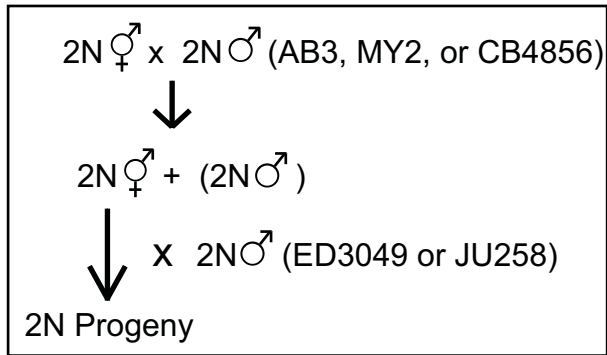

|          | Chromosome |      |      |    |     |    |    |
|----------|------------|------|------|----|-----|----|----|
| Genotype | I          | II a | II b | II | III | IV | V  |
| AC       | 26         | 20   | 23   | 43 | 24  | 17 | 24 |
| BC       | 20         | 18   | 24   | 42 | 22  | 21 | 23 |
| Total    | 46         | 38   | 47   | 85 | 46  | 38 | 47 |

**Figure. S3: Polymorphisms segregate in a Mendelian fashion in diploid crosses.** N2 diploid hermaphrodites were mated with males of the listed polymorphic strains. The heterozygous hermaphrodite progeny were then mated with males of a second polymorphic strain. Genotypes of the progeny show that none of the polymorphism exhibit segregation bias.

## Control crosses

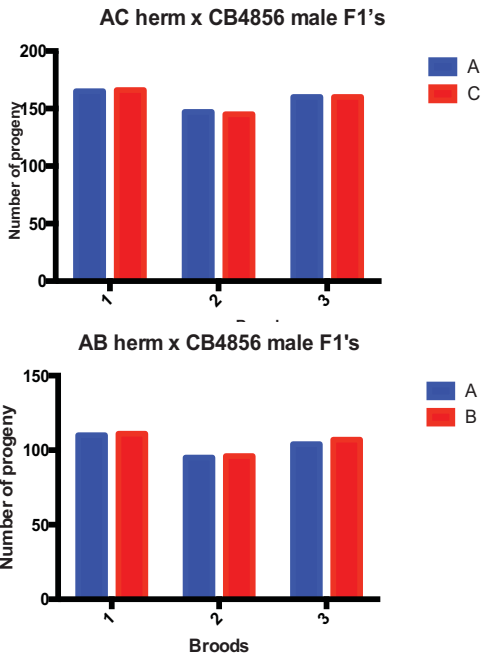

**Figure S4. Transgenes used to generate the trisomy IV worms do not cause segregation bias.** Results from diploid hermaphrodites containing markers A and C, or markers A and B, crossed with CB4856. Equal frequencies of the markers were observed in the F1's. This control shows that there is Mendelian inheritance of the 3 different transgenes in diploid worms.
